# Supplementary material
Source: publisher site journal article supplement (https://www.dovepress.com/get_supplementary_file.php?f=222532.xlsx)
Supplement: Supplementary file 1 [file get_supplementary_file.php]

## Sheet: Table S1
Table S1. 2019 list of American Geriatrics Society Beers Criteria®for Potentially Inappropriate Medication Use in OlderAdult
Class and Medication	Users count	Average of Age of uses	Average Duration in days per user
Alpha 2 agonist	13	74.0556	279.533
CloNIDine 0.15 mg TAB	13	74.0556	279.533
alpha1 blockers	21	71.9091	274.526
Doxazocin 1mg TAB	1	73	90
Doxazosin 2 mg TAB	1	72	301
Doxazocin 4 mg TAB	6	70.6667	155.1
Doxazosin 8 mg (sustained release) TAB	1	73	154
Prazosin 1 mg TAB	14	74.0625	321.222
Prazosin 2 mg TAB	4	70	357
Androgens	10	70.4545	170.75
Testosterone CAP	1	91	181
Testosterone INJ	9	68.4	170.75
Antiarrythmic	55	73.6731	347.708
Amiodarone	14	71.5238	355.385
Digoxin 0.25 mg TAB	53	74.0968	382.042
Antibiotic	87	74.9821	211.04
Nitrofurantoin	87	74.9821	211.04
Antidepressant	225	71.5934	225.148
Amitriptyline 10 mg TAB	151	72.2526	188.934
Amitriptyline 25 mg TAB	58	70.44	255.114
ClomiPRAMINE 25 mg TAB	8	69	261
ClomiPRAMINE 75 mg (sustained release) TAB	1	71	131.333
Imipramine 10 mg TAB	10	71.4167	181.857
Imipramine 25 mg TAB	7	72.75	392.5
Paroxetine 20 mg TAB	20	71.12	312.077
Trimipramine 25 mg TAB	1	67	37
Trimipramine 50mg CAP	1	67	92
Antidepressants + Antipsychotic	26	72.3137	264.192
FluPHENAZine HCl/Nortriptyline HCl	26	72.3137	264.192
Antidepressants + Benzodiazepines	1	86	194.667
Amitriptyline/Chlordiazepoxide	1	86	194.667
Antiemetic	327	72.8831	137.296
Metoclopramide	327	72.8831	137.296
Antiparkinsonian	10	72.8	487.143
Benztropine 2mg TAB	5	73.7143	54
Trihexyphenidyl (benzhexol) 2 mg TAB	6	72	559.333
Antipsychotic	329	74.8912	263.623
Amisulpride	1	82	293
ARIPiprazole	6	77.5556	162.25
ChlorproMAZINE	4	70.3333	209.75
Flupenthixol	52	71.962	366.556
FluPHENAZine	1	71	289
Haloperidol	31	79.52	165.533
OLANZapine	27	70.7619	152.818
Paliperidone	1	66	177
ProCHLORPERazine	97	71.9469	170.833
QUEtiapine	108	76.896	291.913
RisperiDONE	39	78.9574	251.727
Sulpiride	10	71.3125	231
Trifluoperazine	2	67	580.5
Antispasmodic	390	72.7489	189.72
Hyoscine N Butyl Bromide 10 mg TAB	388	72.7643	189.72
Umeclidinium/Vilanterol (Anoro Ellipta) 55mcg/22mcg/dose (30 doses) DPI	2	70.3333	192.6
Antispasmodics + Benzodiazepines	9	72.6667	251.25
Chlordiazepoxide/Clidinium bromide	9	72.6667	251.25
Appetite stimulant	12	73.3571	271.25
Megestrol	12	73.3571	271.25
Barbiturates	3	72.5	630.667
PHENobarbital	3	72.5	630.667
Benzodiazepines & Z-Drugs	105	77.1958	206.111
ALPRAZolam	10	79.9474	242.2
CLONazepam	31	75.4889	224.8
Diazepam	3	75.3333	132
LORazepam	33	75	200.667
Temazepam	4	73.6	127.5
Zolpidem	50	78.4697	178.8
Zopiclone	2	87.6667	402.75
Calcium Channel Blockers	2	73.5	432
NIFEdipine 5mg CAP	2	73.5	432
Diabetes Medications SSI	13	75.05	312.545
Insulin Aspart	9	78.0769	194.5
Insulin Lispro	1	78	440.5
Insulin Regular	3	66	463.333
Estrogens	18	71.1739	101.833
Estrogens, Conjugated TAB	1	66	109
Estrogens, Conjugated 0.625 mg/gm (42.5 gm) Vaginal CRM	16	70.2778	68.75
Ethinylestradiol/Gestodene 0.03 mg/0.075 mg TAB	1	66	168
First-generation antihistamines	1068	72.9671	138.869
Chlorph/Pseudoephedrine/Dextromethorphan	52	73.4138	55
Chlorpheniramine	56	73.3846	49
Chlorpheniramine/Pseudoephedrine	38	71.375	202
Cinnarizine/Dimenhydrinate 20 mg/40 mg TAB	1	83	67
Cyproheptadine	3	73	61.5
Diphenhydramine/NH4Cl/Na Citrate/Menthol	830	72.6595	104.017
HydrOXYzine	171	74.3289	196.331
Promethazine	51	72.5893	141.125
Tripolidime/Pseudoephedrine/Dextromethorphan 1.25/30/10mg/5mL (100 mL) SOL - C	4	75.8	61
Triprolidine/Pseudoephedrine	31	71.4516	171.25
long-acting Sulfonylureas	299	71.5058	375.678
Glibenclamide (GlyBURIDE)	31	71.3958	331.067
Glibenclamide/Metformin 2.5mg/500mg TAB	1	70	133
Glimepiride	272	71.5075	380.93
GlyBURIDE-metformin 5 mg/500 mg Tab	1	79	87
Muscle relaxants	1934	72.0855	310.311
Paracetamol/Orphenadrine 450 mg/35 mg TAB	1934	72.0855	310.311
Non Selective NSAID	87	71.2143	238.49
Diclofenac	13	67.7143	221.643
Ibuprofen	32	72.1515	305.364
Meloxicam	41	71.6047	190.256
Naproxen	8	71.375	251.375
Selective COXII NSAID	574	71.5821	311.955
Celecoxib	574	71.5821	311.955
PPI	1425	73.2504	473.356
Esomeprazole	426	73.3492	447.913
Lansoprazole	91	75.8854	374.938
Omeprazole	1	65	106
Pantoprazole	626	73.1139	475.954
RABEprazole	503	72.8544	512.002
Vasopressin Analog	9	72	86
Desmopressin	9	72	86
Total of PIM users	2215	72.9	344.75

## Sheet: Table S2
Table S2. Ethnicity geograohical groups with their average age and gender classified by the patients nationalities
	Female		Male		Total
	Average of Age	No of Patients	Average of Age	No of Patients	Average of Age	No of Patients
Gulf	73.1893	1045	74.4891	937	73.7696	1982
Bahraini	74.9648	19	70.1745	11	73.4568	30
Emirati	81.0968	4	-	-	81.0968	4
Iraqi	73.5047	13	73.8742	20	73.7066	33
Kuwaiti	75.4321	3	-	-	75.4321	3
Omani	71.2688	5	75.2831	13	74.0783	18
Qatari	73.0607	950	74.6203	848	73.7527	1798
Saudi	76.3125	22	76.508	7	76.3689	29
Yemeni	75.0107	29	71.8328	38	73.189	67
Eastern Mediterranean	73.4833	233	72.5493	308	72.9804	541
Jordanian	72.1417	63	72.8734	89	72.5831	152
Lebanese	72.7474	20	69.2188	29	70.9751	49
Palestinian	73.7687	86	73.9681	120	73.8752	206
Syrian	74.5749	64	70.4286	70	72.5972	134
North African	71.3763	87	69.9573	140	70.504	227
Algerian	73.303	5	80.6512	2	75.5282	7
Egyptian	71.4254	76	69.8938	128	70.4851	204
Libyan	67	1	66.4651	2	66.6806	3
Moroccan	68.9417	3	68.4877	4	68.6642	7
Tunisian	77.6667	2	71.8483	4	71.9662	6
Black African	72.4544	48	70.1011	122	70.6844	170
Eritrean	65	1	69	1	67.0952	2
Ethiopian	67	1	70	1	68.9157	2
Ghanaian			65	1	65	1
Mauritanian	68	1	76	1	70.56	2
Nigerian	75.5714	2	-	-	75.5714	2
Somali	77.9825	8	71.7981	20	74.19	28
South African	70.1702	2	-	-	70.1702	2
Sudanese	70.0353	33	69.7495	98	69.8033	131
Asian	69.6722	148	70.5945	372	70.2817	520
Afghan	-	-	66.4874	6	66.4874	6
Bangladeshi	67.5303	3	66.6079	17	66.7304	20
Filipino	66.916	16	67.7089	11	67.1669	27
Indian	68.5536	40	68.901	103	68.7819	143
Indonesian	67	1	-	-	67	1
Iranian	70.8248	25	74.1007	74	73.1654	99
Kyrgystani	-	-	72	1	72	1
Malaysian	-	-	65	1	65	1
Pakistani	70.757	54	70.7639	151	70.7617	205
Singaporean	75	1	65	1	70.1163	2
Sri Lankan	68.9635	8	68.2593	7	68.833	15
White	72.8991	27	71.0578	62	71.7118	89
American	70.1895	7	72.7562	11	71.6273	18
Australian	-	-	70.9355	4	70.9355	4
British	72.4807	8	74.216	12	73.3789	20
Bulgarian		-	72	1	72	1
Canadian	70.5	5	69.0723	15	69.3573	20
Cypriot	68	1	-	-	68	1
Danish	90	1	-	-	90	1
Dutch	-	-	84	1	84	1
German	-	-	65.6923	2	65.6923	2
Greek	-	-	84	1	84	1
Irish	69	1	68.759	4	68.7938	5
Italian	82	1	67.6082	5	69.8609	6
New Zealander	-	-	68	1	68	1
Polish	67.5833	2	66	1	66.7308	3
Swedish	-	-	70.125	2	70.125	2
Turkish	76	1	69	1	75.8889	2
Ukrainian	-	-	65	1	65	1
Others (4 Latin American and 4 unknown)	79.2653	2	75.0256	6	76.6614	8
Total	72.8639	1590	73.0033	1947	72.9347	3537

## Sheet: Table S3
Table S3. Results for continuous determenants differences between PIM groups using t-test
Determinants, Continuous Variables	PIM groups, without PIM - with PIM
	Mean difference	Standard error	95% CI
Age, years	-0.419531	0.241193	-0.892423	0.0533606
wight, kg	-2.59778	0.705834	-3.98179	-1.21377
BMI, kg/m2	-1.13614	0.259596	-1.64516	-0.627114
Serum Creatinine umol/L	-9.04873	2.89044	-14.7161	-3.38138
eGFR ml/min/1.73m2	4.1	0.873837	2.38469	5.8114
Sodium	0.543671	0.12994	0.288894	0.798448
Chronic medications	-5.01268	0.141107	-5.28934	-4.73602
Comorbidities	-0.682983	0.0435004	-0.768271	-0.597694
CNS active meds	-0.950003	0.081768	-1.11032	-0.789686
Anticholinergics	-0.872199	0.0560715	-0.982134	-0.762263
ED visits	-0.533948	0.117958	-0.76522	-0.302676

## Sheet: Table S4
		Table S4. Results for continuous variables compared within polypharmacy groups using Benferroni after ANOVA
		Determinants		Polypharmacy group, medications
			Baseline	0-5	0-5	6-10
			Comparator	6-10	>10	>10
		Age, years	Mean difference	0.58951	0.768178	0.178667
			P-value	0.097	0.034	1
		wight, kg	Mean difference	2.73497	7.36783	4.63286
			P-value	0.002	<0.001	<0.001
		BMI kg/m2	Mean difference	0.874245	2.23876	1.36452
			P-value	0.011	<0.001	<0.001
		Serum Creatinine umol/L	Mean difference	13.6	26.9	13.3
			P-value	<0.001	<0.001	<0.001
		eGFR ml/min/1.73m2	Mean difference	-5.8	-12.4	-6.6
			P-value	<0.001	<0.001	<0.001
		Sodium	Mean difference	-0.483316	-1.33194	-0.848621
			P-value	0.004	<0.001	<0.001
		Chronic medications	Mean difference	5.34895	11.1387	5.78977
			P-value	-	-	-
		Comorbidities	Mean difference	1	1.7	0.6
			P-value	<0.001	<0.001	<0.001
		PIMs	Mean difference	0.6	1.2	0.6
			P-value	<0.001	<0.001	<0.001
		CNS active meds	Mean difference	0.507343	1.58161	1.07427
			P-value	<0.001	<0.001	<0.001
		Anticholinergics	Mean difference	0.5	1.2	0.7
			P-value	<0.001	<0.001	<0.001
		ED visits	Mean difference	0.4	1	0.6
			P-value	<0.001	<0.001	<0.001
